# Supplementary material for: Microplastics Footprints in a High-Altitude Basin of the Tibetan Plateau, China
Source: MDPI journal article supplement (doi:10.3390/w13202805), 2021-10-09
Supplement: s1 [file s1]

## Supplementary materials

### Microplastic footprints in a high-altitude basin of the Tibetan Plateau, China

Sansan Feng <sup>1,2</sup>, Hongwei Lu <sup>2,\*</sup>, Tianci Yao <sup>2</sup>

<sup>1</sup> School of Renewable Energy, North China Electric Power University, Beijing, 102206, China.

<sup>2</sup> Key Laboratory of Water Cycle and Related Land Surface Process, Institute of Geographic Science and Natural Resources Research, Chinese Academy of Science, Beijing, 100101, China.

\*Corresponding author: Tel: +86-10-61772416; Fax: +86-10-61772416; E-mail: luhw@igsnrr.ac.cn

### Text S1 Selection of separation fluid

CaCl<sub>2</sub> solution have relatively higher density (1.5 g cm<sup>-3</sup>) than NaCl solution (1.2 g cm<sup>-3</sup>), which may have high recoveries of PET (density 1.34–1.58 g cm<sup>-3</sup>), PVC (density 1.16–1.35 g cm<sup>-3</sup>) and other MPs with densities greater than 1.2 cm<sup>-3</sup>. However, the filter and MPs will covered in a thick brownish material after density separation using a CaCl<sub>2</sub> due to the divalent Ca ions will lead to flocculated of organic material (Scheurer and Bigalke, 2018). Therefore, the separation fluid was changed to NaCl solution during the last two flotation processes.

## 2. Supplementary Figures

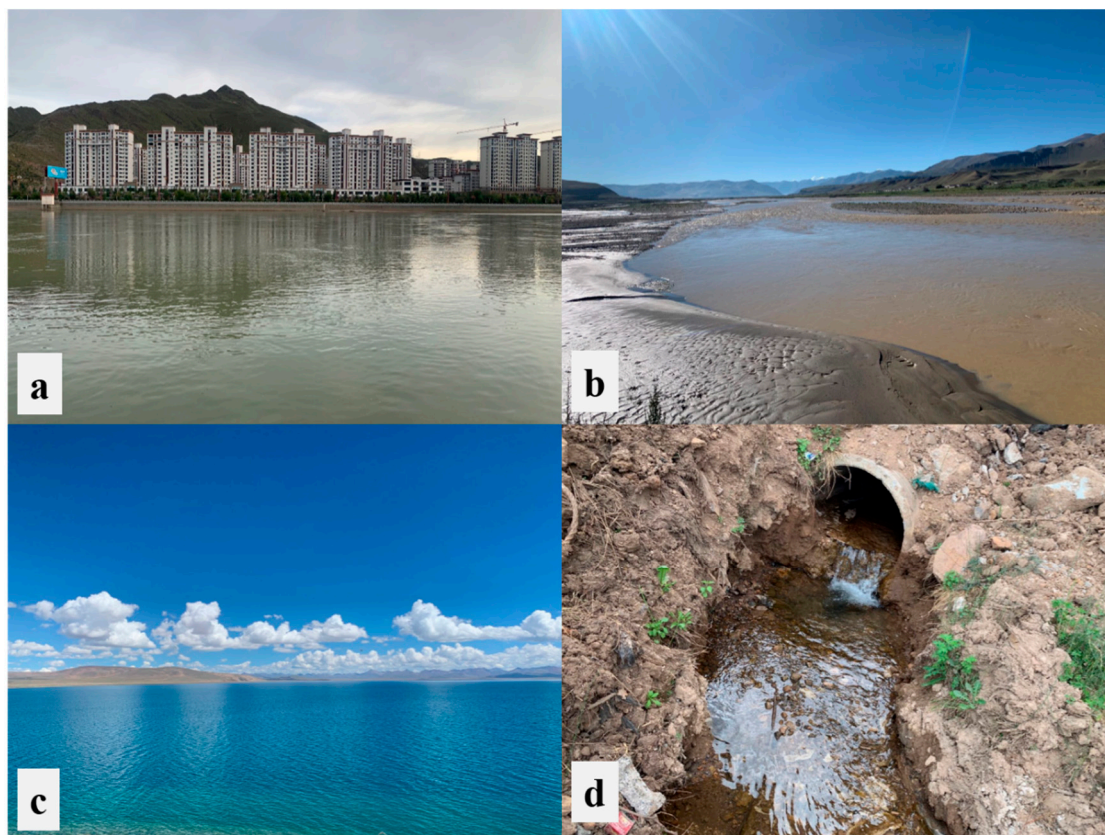

**Figure S1** Photographs of typical sampling site (**a.** urban river, **b.** rural river, **c.** lake, **d.** agricultural channel.)

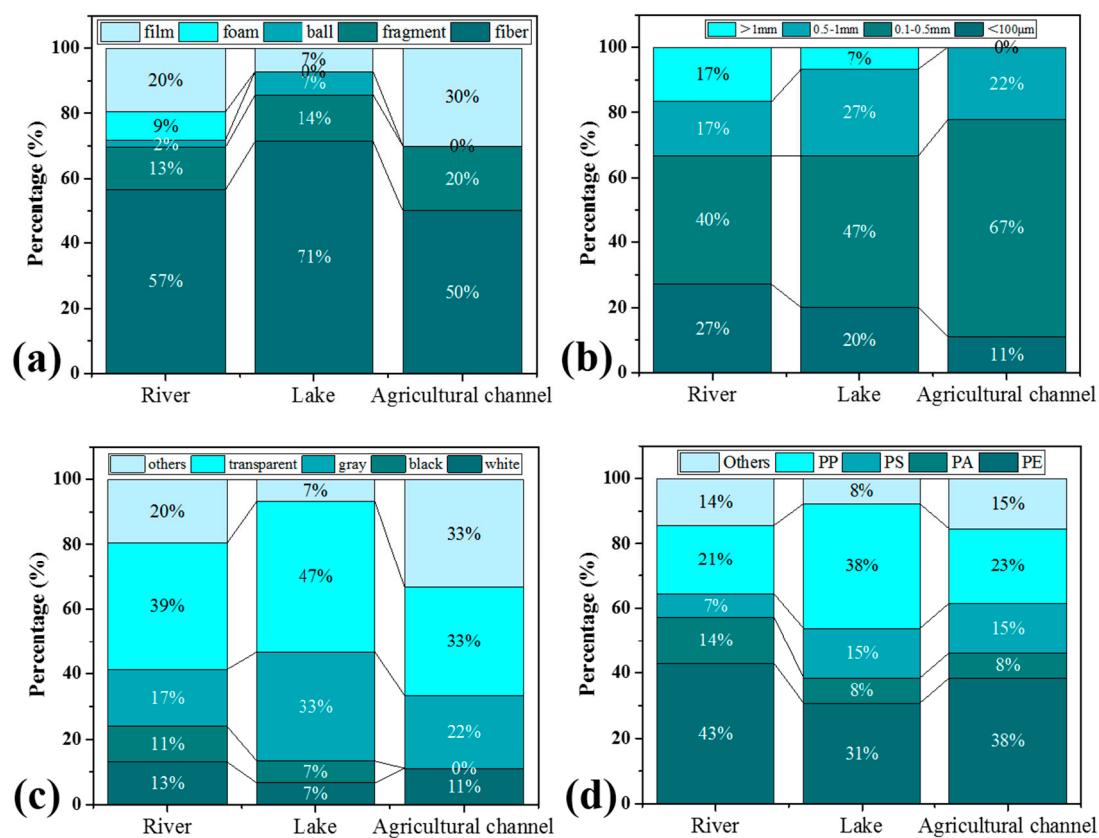

**Figure S2** (a) Shape, (b) size, (c) color and (d) polymer distribution of MPs between different water body types.

### 3. Information of sampling sites

**Table S1** Information for each sampling site of surface water and sediment

| Site | Water type                    | sediment | Longitude | Latitude  | Elevation (m) |
|------|-------------------------------|----------|-----------|-----------|---------------|
| R1   | River (N=9)                   | -        | 94°27'53" | 29°27'06" | 3000          |
| R2   |                               | -        | 93°4'5"   | 29°3'1"   | 3737          |
| R3   |                               | -        | 92°34'21" | 29°8'51"  | 3599          |
| R4   |                               | Y        | 90°46'5"  | 29°16'37" | 3580          |
| R5   |                               | Y        | 91°53'18" | 28°58'40" | 3880          |
| R6   |                               | Y        | 91°45'15" | 31°38'28" | 4550          |
| R7   |                               | Y        | 91°6'2"   | 30°28'48" | 4231          |
| R8   |                               | -        | 90°34'0"  | 30°4'37"  | 4228          |
| R9   |                               | -        | 91°6'25"  | 29°38'41" | 3606          |
| L1   | Lake (N=3)                    | Y        | 91°59'15" | 28°10'17" | 4529          |
| L2   |                               | -        | 90°0'46"  | 30°48'5"  | 4760          |
| L3   |                               | Y        | 91°5'16"  | 31°14'38" | 4670          |
| A1   | Agricultural channel<br>(N=2) | Y        | 90°19'8"  | 31°20'17" | 4610          |
| A2   |                               | Y        | 90°57'41" | 29°32'1"  | 3620          |

**Table S2** Polymers of MPs identified in the water of study area

| Number | Polymer type               | abbreviation |
|--------|----------------------------|--------------|
| 1      | polypropylene              | PP           |
| 2      | polyethylene               | PE           |
| 3      | polyamide/nylon            | PA           |
| 4      | polystyrene                | PS           |
| 5      | polyethylene terephthalate | PET          |
| 6      | polyvinyl chloride         | PVC          |
| 7      | ethylene vinyl acetate     | EVA          |
| 8      | polycarbonate              | PC           |
| 9      | polyvinyl alcohol          | PVA          |
| 10     | polyurethane               | PU           |
| 11     | Polyisoprene               | -            |
| 12     | polyacrylonitrile          | PAN          |
| 13     | isoprene rubber            | IR           |
